# Supplementary material for: CBS mutations are good predictors for B6‐responsiveness: A study based on the analysis of 35 Brazilian Classical Homocystinuria patients
Source: PubMed Central journal article supplement (PMC5902399; doi:10.1002/mgg3.342), 2018-01-20
Supplement: MGG3-6-160-s002.pdf [file MGG3-6-160-s002.pdf]

# S2 A) Figure

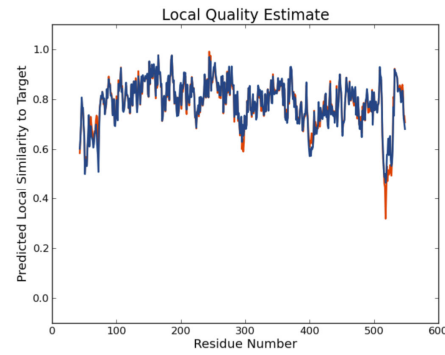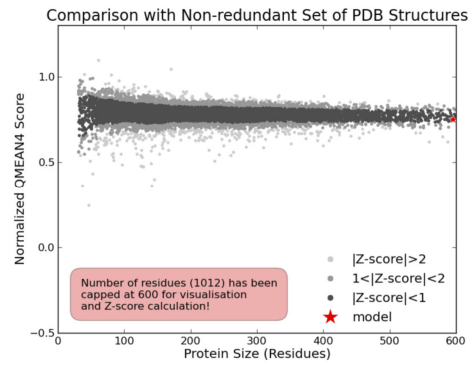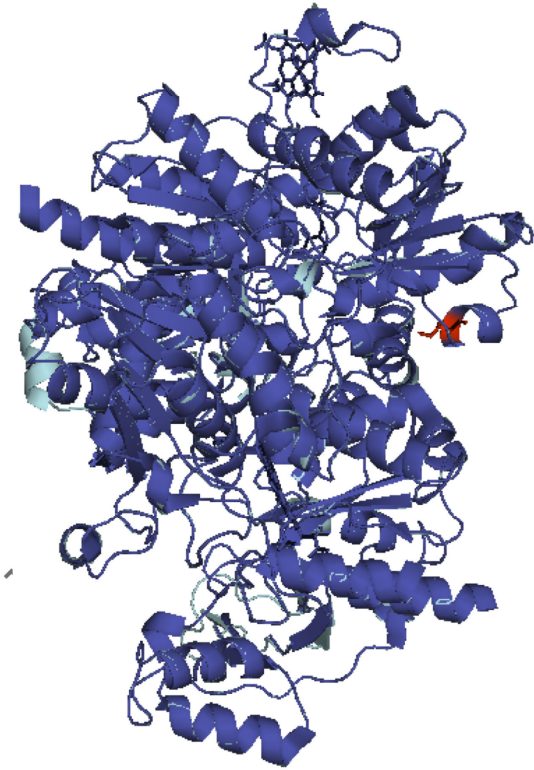

## Model-Template Alignment

```

Model_02:A MPSETPQAEVGTGCPHRSRSGPHSAKGSLEKSPEDKEAKEPLWIRFPDAPSRCTWQLGRPAESP...
Model_02:B MPSETPQAEVGTGCPHRSRSGPHSAKGSLEKSPEDKEAKEPLWIRFPDAPSRCTWQLGRPAESP...
4coo.1.A MPSETPQAEVGTGCPHRSRSGPHSAKGSLEKSPEDKEAKEPLWIRFPDAPSRCTWQLGRPAESP...
Model_02:A LKCELLAKCEFFNAGGSVKDRISLRMIEDAERDGTLLKPGDITIEPTSGNTGIGLALAAAVRGYRCI...
Model_02:B LKCELLAKCEFFNAGGSVKDRISLRMIEDAERDGTLLKPGDITIEPTSGNTGIGLALAAAVRGYRCI...
4coo.1.A LKCELLAKCEFFNAGGSVKDRISLRMIEDAERDGTLLKPGDITIEPTSGNTGIGLALAAAVRGY...
Model_02:A ESHVGVAVRLKNEIPNSHILDQYRNASNPLAHYDTTAADEILQQCDGKLDMLVASVGTGGTITGIARKL...
Model_02:B ESHVGVAVRLKNEIPNSHILDQYRNASNPLAHYDTTAADEILQQCDGKLDMLVASVGTGGTITGIARKL...
4coo.1.A ESHVGVAVRLKNEIPNSHILDQYRNASNPLAHYDTTAADEILQQCDGKLDMLVASVGTGGTITGI...
Model_02:A YEVEGIGYDFIPTVLDRTVVVDKWFKSNDEEAFTFARMLIAQEGLLCGGSAGSTVAVAVKAAQELQEG...
Model_02:B YEVEGIGYDFIPTVLDRTVVVDKWFKSNDEEAFTFARMLIAQEGLLCGGSAGSTVAVAVKAAQELQEG...
4coo.1.A YEVEGIGYDFIPTVLDRTVVVDKWFKSNDEEAFTFARMLIAQEGLLCGGSAGSTVAVAVKAAQEL...
Model_02:A DLTEKKPWWWHLRVQELGLSAPLTVLPTITCGHTIEILREKGFDAQPVVDEAGVILGMVTLGNMLSS...
Model_02:B DLTEKKPWWWHLRVQELGLSAPLTVLPTITCGHTIEILREKGFDAQPVVDEAGVILGMVTLGNMLSS...
4coo.1.A DLTEKKPWWWHLRVQELGLSAPLTVLPTITCGHTIEILREKGFDAQPVVDEAGVILGMVTLGNM...
Model_02:A HILEMDHFALVVHEQIQYHSTGKSSQRQMVFGVVTAIDLNFVAAQERDQK
Model_02:B HILEMDHFALVVHEQIQYHSTGKSSQRQMVFGVVTAIDLNFVAAQERDQK
4coo.1.A HILEMDHFALVVHEQIQYHSTGKSSQRQMVFGVVTAIDLNFVAAQERDQK
    
```

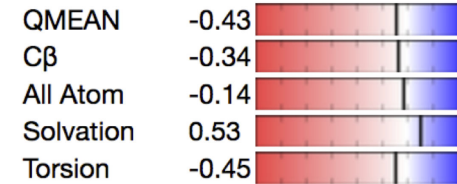

| Template | Seq Identity | Oligo-state | Found by | Method | Resolution | Seq Similarity | Range    | Coverage | Description                 |
|----------|--------------|-------------|----------|--------|------------|----------------|----------|----------|-----------------------------|
| 4coo.1.A | 99.82        | homo-dimer  | BLAST    | X-ray  | 2.00Å      | 0.61           | 43 - 548 | 0.98     | CYSTATHIONINE BETA-SYNTHASE |

## S2 B) Figure

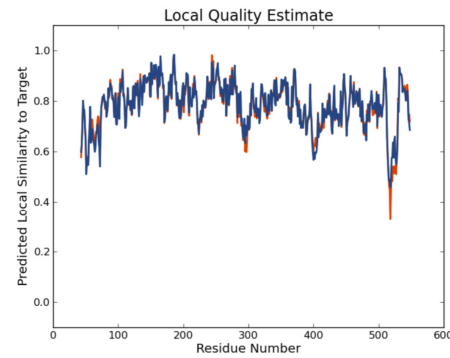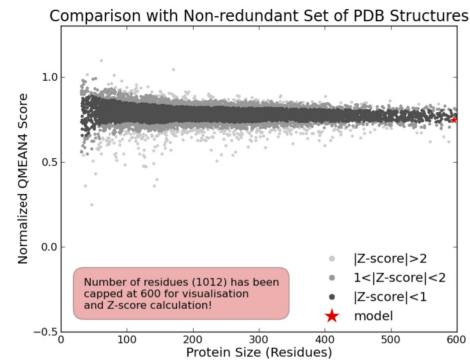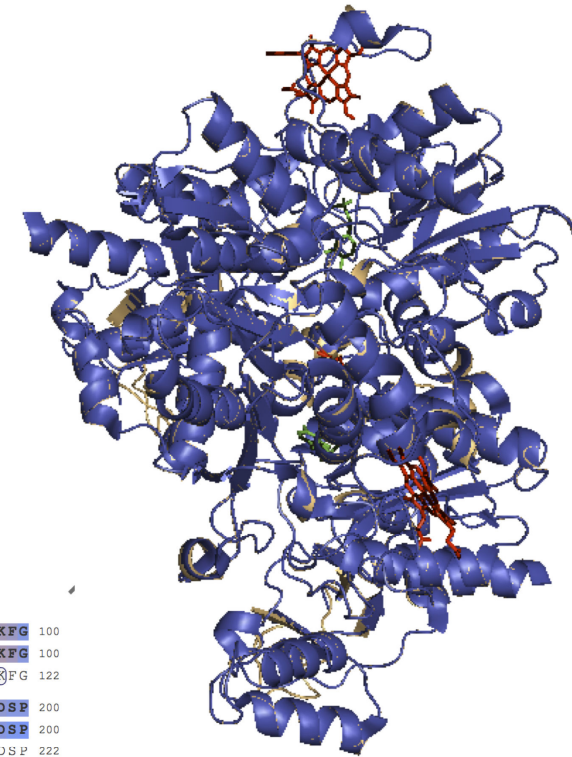

### Model-Template Alignment

|            |                                              |                                                                |          |               |                                            |     |
|------------|----------------------------------------------|----------------------------------------------------------------|----------|---------------|--------------------------------------------|-----|
| Model_03:A | MPSETPQAEVGP                                 | TCGPHRSGPHSAKGSLEKGSPEDEKAKEPL                                 | WIRPDAPS | RCTWQLGR      | PASESPHHHTAPAKSPKILPDILKKIGDTPMVRINKIGKFFG | 100 |
| Model_03:B | MPSETPQAEVGP                                 | TCGPHRSGPHSAKGSLEKGSPEDEKAKEPL                                 | WIRPDAPS | RCTWQLGR      | PASESPHHHTAPAKSPKILPDILKKIGDTPMVRINKIGKFFG | 100 |
| 4coo.1.A   | MPSETPQAEVGP                                 | TCGPHRSGPHSAKGSLEKGSPEDEKAKEPL                                 | WIRPDAPS | RCTWQLGR      | PASESPHHHTAPAKSPKILPDILKKIGDTPMVRINKIGKFFG | 122 |
| Model_03:A | LKCELLAKCVFFNAGGSVKDRISLRMIEDAERDGLKPGD      | TIIIEPTSGNTGIGLALAAAVRGYRCIIIVMPEKMSSEKVDVLRALGAEIVRTPTNARFDSF |          |               |                                            | 200 |
| Model_03:B | LKCELLAKCVFFNAGGSVKDRISLRMIEDAERDGLKPGD      | TIIIEPTSGNTGIGLALAAAVRGYRCIIIVMPEKMSSEKVDVLRALGAEIVRTPTNARFDSF |          |               |                                            | 200 |
| 4coo.1.A   | LKCELLAKCVFFNAGGSVKDRISLRMIEDAERDGLKPGD      | TIIIEPTSGNTGIGLALAAAVRGYRCIIIVMPEKMSSEKVDVLRALGAEIVRTPTNARFDSF |          |               |                                            | 222 |
| Model_03:A | ESHVGVAVRLKNEIPNSHILDQYRNASNPLAHYD           | TDAEILQQCDGKLDMLVASVGTGGTITGIARKLKEKCPGCR                      | RIIGVD   | PEGSILAEPEELN | QTEQTT                                     | 300 |
| Model_03:B | ESHVGVAVRLKNEIPNSHILDQYRNASNPLAHYD           | TDAEILQQCDGKLDMLVASVGTGGTITGIARKLKEKCPGCR                      | RIIGVD   | PEGSILAEPEELN | QTEQTT                                     | 300 |
| 4coo.1.A   | ESHVGVAVRLKNEIPNSHILDQYRNASNPLAHYD           | TDAEILQQCDGKLDMLVASVGTGGTITGIARKLKEKCPGCR                      | RIIGVD   | PEGSILAEPEELN | QTEQTT                                     | 322 |
| Model_03:A | YEVEGIGYDFIPTVLDRTVVVDKWFKSNDEEAFTFARMLIAQEG | LLCGGSAGSTVAVAVKAAQELQEGQRCVVILPDSVRNYMTKFLSDRWMLQKGFLEE       |          |               |                                            | 400 |
| Model_03:B | YEVEGIGYDFIPTVLDRTVVVDKWFKSNDEEAFTFARMLIAQEG | LLCGGSAGSTVAVAVKAAQELQEGQRCVVILPDSVRNYMTKFLSDRWMLQKGFLEE       |          |               |                                            | 400 |
| 4coo.1.A   | YEVEGIGYDFIPTVLDRTVVVDKWFKSNDEEAFTFARMLIAQEG | LLCGGSAGSTVAVAVKAAQELQEGQRCVVILPDSVRNYMTKFLSDRWMLQKGFLEE       |          |               |                                            | 422 |
| Model_03:A | DLTEKKPWWHHLRVQELGLSAPLTVLPTITCGHTIEILREKGF  | QAPVVD EAGVILGMVTLGNMSSL LAGKVQPSDQVGVVIYKQFKQIRLTDTLGRLS      |          |               |                                            | 500 |
| Model_03:B | DLTEKKPWWHHLRVQELGLSAPLTVLPTITCGHTIEILREKGF  | QAPVVD EAGVILGMVTLGNMSSL LAGKVQPSDQVGVVIYKQFKQIRLTDTLGRLS      |          |               |                                            | 500 |
| 4coo.1.A   | DLTEKKPWWHHLRVQELGLSAPLTVLPTITCGHTIEILREKGF  | QAPVVD EAGVILGMVTLGNMSSL LAGKVQPSDQVGVVIYKQFKQIRLTDTLGRLS      |          |               |                                            | 522 |
| Model_03:A | HILEMDHFALVVHEQIQYHSTGKSSQRQMVFGVVT          | AIDL NLFVAAQERDQK                                              |          |               |                                            | 551 |
| Model_03:B | HILEMDHFALVVHEQIQYHSTGKSSQRQMVFGVVT          | AIDL NLFVAAQERDQK                                              |          |               |                                            | 551 |
| 4coo.1.A   | HILEMDHFALVVHEQIQYHSTGKSSQRQMVFGVVT          | AIDL NLFVAAQERDQK                                              |          |               |                                            | 563 |

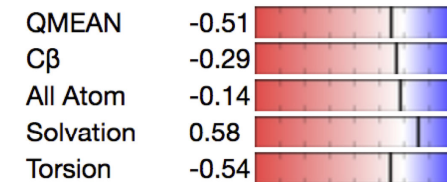

| Template | Seq Identity | Oligo-state | Found by | Method | Resolution | Seq Similarity | Range    | Coverage | Description                 |
|----------|--------------|-------------|----------|--------|------------|----------------|----------|----------|-----------------------------|
| 4coo.1.A | 99.82        | homo-dimer  | BLAST    | X-ray  | 2.00Å      | 0.61           | 43 - 548 | 0.98     | CYSTATHIONINE BETA-SYNTHASE |
